# Supplementary material
Source: Springer Nature journal article supplement (https://www.springermedizin.de/resource/supplementary/12916_2014_948_MOESM4_ESM.pdf/9598896)

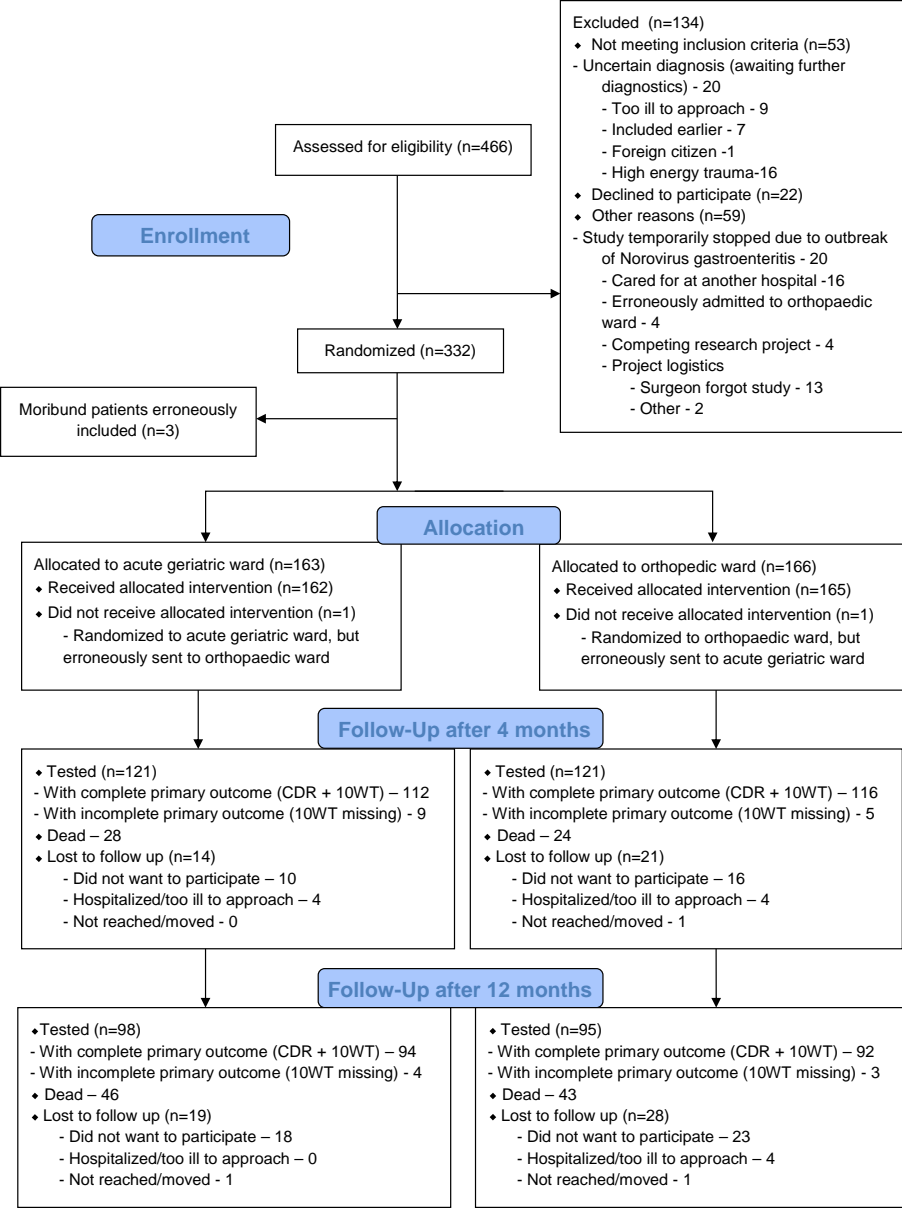

Supplement: MOESM4 [file 9598896]
